# Supplementary material
Source: publisher figshare collection journal article supplement (https://sage.figshare.com/ndownloader/files/15253757)
Supplement: Supplementary file 1 [file 15253757]

| Appendix A. Written Resident Feedback of Resident Led SUGAR Simulations |
| --- |
| "I think that the cases were emotionally heavy, which was draining after completing four.” |
| “It would be nice to have a review of the medical content at the end rather than spending so much time on debriefing.” |
| “My only suggestion is after each of the scenario, if we can have the preceptors demonstrate how they will approach the case.” |
| "I love how the cases made you run through your own emotions and question the knowledge you knew cold.” |
| "I think futility may have had too much difficulty in it...trying to do such a hard lesson with the added difficulty of a language barrier may have been too much at once to really get the most out of it.” |
| “I especially appreciated the emphasis on the awareness of the resource limitations overseas, and think outside the box instead of following our AAP recommendations as they do not apply to populations outside the US.” |
| “I loved being able to participate in something so different from what I am used to learning day-to-day.” |
| “The opportunity to lead sessions forced me to learn the material on a different level than before and provided me with valuable teaching experience.” |
| “Since we spent a lot of time debriefing, having a summary sheet with all of the medical concepts might be helpful”. |
| “Completing the SUGAR curriculum in anticipation of starting a global health elective was a helpful exercise. It stimulated a case in a resource poor setting in a culture I was unfamiliar with. It helped transition my thinking to be mindful of the culture I was going to enter and also consider how I would need to change my approach to medical care during my time away.” |
| “It was helpful to go through scenarios that we might encounter while abroad, and to be able to think together with a group about how to overcome or face obstacles that might arise.” |
| “It helped me build confidence and practice improvising skills to help deliver quality patient care where there may be less resources than I am used to.” |
